# Supplementary material
Source: Springer Nature journal article supplement (https://www.springermedizin.de/resource/supplementary/12874_2006_163_MOESM1_ESM.pdf/9433910)

**102**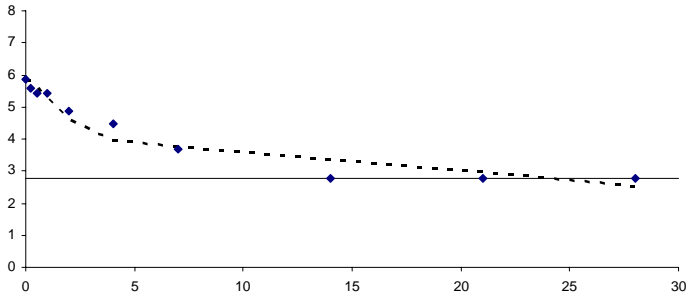**102**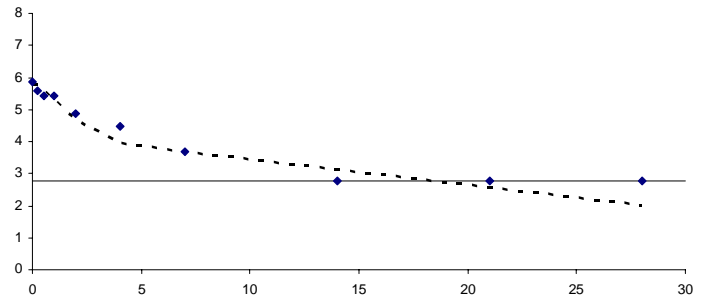**108**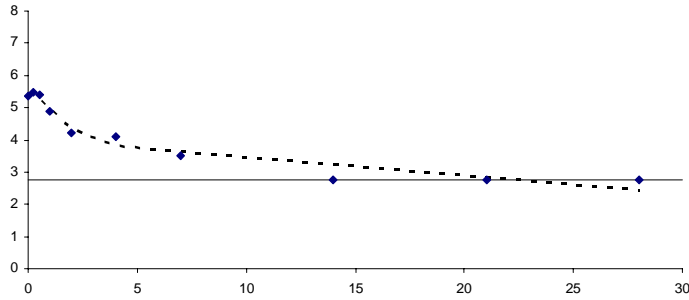**108**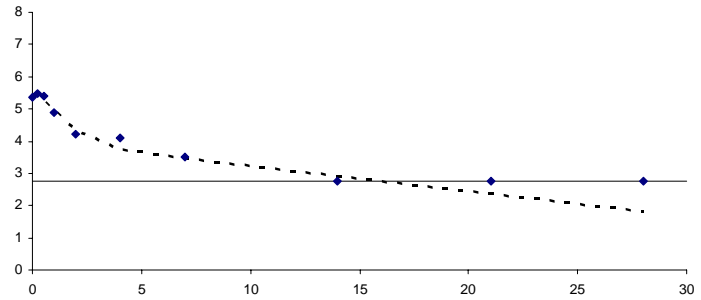**201**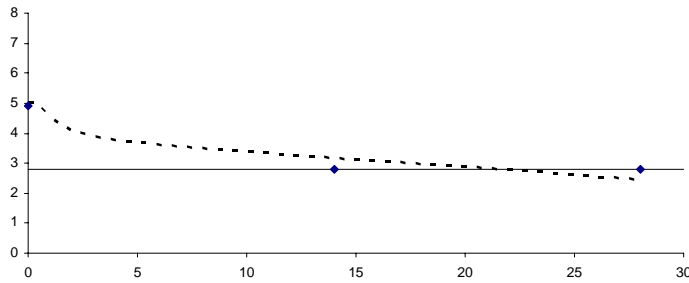**201**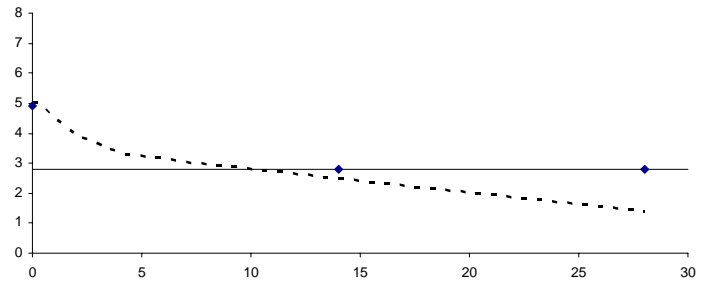**206**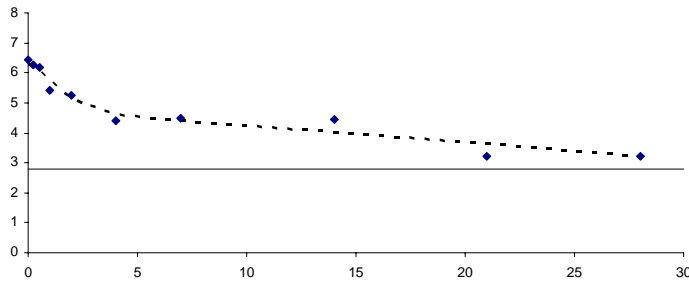**206**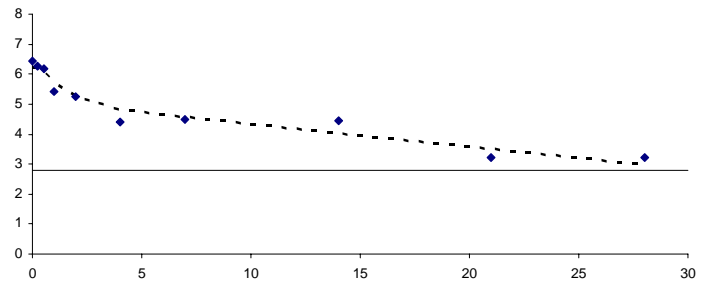Log<sub>10</sub> IU/mL

Days

Supplement: MOESM1 [file 9433910]
